# Supplementary material for: Understanding how digital training enhances healthcare worker perceptions of HIV index case testing: a qualitative explanatory analysis
Source: Research Square preprint supplement (doi:10.21203/rs.3.rs-8853616/v1), 2026-03-22
Supplement: Supplementary file 1 [file f24b8cdfd3ab8dd291d93dca.docx]

**Supplementary information: PRACTICE Study in-depth interview guide**

**PRACTICE Study: In-Depth Interview (IDI) Guide (English)**

**Date |___|___| / |___|___|___|/ |___|___| (DD/MMM/YY)**

**Start time |___|___|:|___|___| End time |___|___|:|___|___|**

**Staff ID: |___|___|___|**

**Facility ID |___|___|___|**

**Health care worker ID |___|___|___|___|**

**Wave**  (0) Pre ****(1) Post 1 ****(2) Post 2

**Study arm** (0) Standard of care ****(1) Enhanced

**District** (0) Balaka ****(1) Machinga

# **Introduction**

Thank you all for meeting with me today. We appreciate your time. We have invited you to participate in this discussion to help us learn about your experiences with Malawi’s index case testing (ICT) and voluntary assisted partner notification (VAPN) program. We expect this conversation will take approximately one hour. Before we get started, we wanted to set some ground rules for this discussion:

- I hope you will feel open and share your thoughts. There are no right or wrong answers. We want to hear about your honest opinions, even if they are not positive.
- We will be audio-recording this information. Although we are recording, your information will be de-identified and will be kept confidential. We will only share what health workers said overall, but not what any individual person said. We will also not share what you say with your supervisors. It is ok to be critical even of them.
- We also want to protect other peoples’ confidentiality. Please do not share the names of any patients, health workers, or health facilities. You can refer to “a colleague” or “this facility” but please do not use names.

What questions or concerns do you have for me before we begin?

I am going to turn on the audio recorder now. Is this ok? ***[Turn audio recording on]***

Today isdate. This is time. This interview is being conducted by facilitator ID XXXXX. This is an interview with ID XXXXX conducted at facility ID XXX in the XX arm. Before we begin, I would like to confirm that you have been consented and agree to participate in this study. Is it ok if we begin now?

**IV. Experiences with the implementation package *(post 2, enhanced arm only)***

I would like to start by asking you about the blended learning training you received around ICT and voluntary assisted partner notification (VAPN) almost a year ago. Some of this training was self-guided and on a tablet and some of this was conducted in small groups.

1. Tell me about the things from the training that you still apply in your work.
2. Which of the components of the training (Individual training, FtF training, Post training feedback, CQI,) did you find most important/helpful? Tell me more about this.
3. Which of the components of the training (Individual training, FtF training, Post training feedback, CQI,) did you find less important/helpful? Tell me more about this.

4) What do you think might have helped you learn the material better?

*Probe on role modeling, practicing, receiving feedback, and refreshers.*

5*)* If the training is to be rolled out to other settings/facilities what do you think should be done.

*Probe on delivery of content, feedback mechanisms, support during and after training, logistics*

On a monthly basis, you attended continuous quality improvement sessions focused on ICT and VAPN through the PRACTICE study.

6) What are the things you most remember from these sessions?

7) Do you think they were helpful in improving the ICT program at your facility?

*Probe on what aspects were perceived to be effective or ineffective.*

8) Did anything change at your facility as a result of the PRACTICE CQI?

9) How do these sessions compare to the CQI sessions you engage in through the Tingathe program?

*Probe on which they enjoy the most, which are more effective?*

10) What thoughts do you have on how the PRACTICE CQI sessions could have been improved?

**V.** **Acceptability and feasibility of counseling index clients**

Now I would like you to think about your experience counselling index clients over the last year..

1. Tell me about your work counseling index clients.

*Probe on the frequency, nature, and location/population.*

*Probe on whether there have been changes in the last year.*

2. What are the first things that come to mind when thinking about counseling index clients?

*Probe on their responses and whether there have been changes in the last year.*

3. What aspects of counseling index clients do you enjoy most? Tell me more about this.

4. What aspects of counseling index clients do you dislike or find challenging or unappealing?

*Probe on their responses and ask what could be changed to avoid these unappealing features.*

5. What types of index clients are the most difficult to counsel? Tell me about this.

*Probe on what support they need to counsel such clients.*

6. Can you tell us about the space you have to conduct index counseling?

*Probe on issues of privacy. Ask if this has changed in the last year.*

7. Can you share about the amount of time you have to conduct index counseling?

*Probe on issues of time. Ask if this has changed at all in the last year.*

8. Are there times when you are expected to screen or counsel index clients, but do not? If so, what are some of the reasons you do not do it?

*Probe on whether this has changed in the last year.*

9. What do you think should be done to make index counseling easier or more appealing?

*Probe on their responses*

10. What do your coworkers say is challenging about index counseling?

*Probe on whether this has changed over the last year.*

11. What activities have there been at your facility to improve index counseling?

*Probe on the frequency and nature of these activities and perceptions around their usefulness.*

12. Tell me about the things from the training that you apply in your work

*Probe for additional areas and/or additional details*

13 Thinking about the last year, what has changed regarding index counseling?

**VI. Acceptability and feasibility of tracing and counseling contacts**

Now I would like you to think about your experience tracing contacts over the last year. By this, we mean conducting phone or physical tracing in the community to find the sexual partners, children, household members, or social contacts of index clients.

1. Tell me about your work tracing contacts.

*Probe on the frequency, type, and nature of tracing contacts, and how this has changed over the last year.*

2. What are the first things that come to mind when thinking about tracing contacts?

*Probe on their responses and whether this changed over the last year.*

3. What aspects of tracing contacts do you enjoy? Tell me about this.

4. What aspects of tracing contacts do you dislike or find challenging or unappealing?

*Probe on their responses. Ask if there are things that could be done to avoid this challenge.*

5. What contacts are the most difficult to find and/or counsel? Tell me about this.

*Probe on whether this has changed in the last year.*

6. Can you tell us about the resources you have for phone tracing? What challenges do you face in this area?

*Probe on issues of call quality, air time.*  *Probe on changes in the last year.*

7. Can you talk about the transportation surrounding physical tracing? What challenges do you face in this area?

*Probe on issues of locating contacts. Probe on changes in the last year.*

8. Are there times when you are expected to conduct contact tracing but do not? If so, what are some of the reasons that stop you from conducting contact tracing?

*Probe on changes in the last year.*

9. What do you think can be done to make contact tracing easier or more appealing?

*Probe on their responses Probe if anything has changed in the last year.*

10. What do your coworkers say is challenging about tracing contacts?

11. What activities have there been at your facility to improve contact tracing?

*Probe on the frequency and nature of these activities and perceptions around their usefulness.*

12. Tell me about the things from the training that you apply in your work

*Probe for additional areas and/or additional details*

*13.* Thinking about the last year, what has changed regarding contact tracing?

## **VII. Provider attitudes**

## In your job, you and your coworkers work with many different types of clients and patients. I want us to discuss what you might see or observe others saying or doing regarding index clients and contacts, many of whom are people living with HIV.

## 1. How do health workers at your facility look at people living with HIV?

## Probe if and how this has changed over the last year.

## 2. Generally, how are index clients and their contacts treated by health care workers at your health facility?

## Probe if and how this has changed over the last year.

## 3. Have you ever observed health care workers treating certain types of index clients or contacts poorly? Can you describe these observations?

## 4. Do you ever observe health care workers treating certain types of index clients or contacts especially well? Can you describe these observations?

**VIII. Closing questions and remarks**

1. What else would you like me to know about counseling index clients or tracing their contacts or about the trainings you have received?

This ends our discussion today. Thank you for your time. We really appreciate the time you took to participate in this discussion today. We will now end the audio recording.

***[Turn audio recording off]***
